# Supplementary material
Source: publisher figshare collection journal article supplement (https://rs.figshare.com/ndownloader/files/22898720)
Supplement: Supplementary file 1 [file 22898720]

## Sheet: Sheet1
Component	Fitness	Type	Estimate	SE	p
1	Workers	Linear	-0.307343	0.421925	0.024
1	Sexuals	Linear	-1.51958	1.00463	0.08
1	Sexuals	Quadratic	6.0691	20.4764	0.084
1	Workers	Quadratic	0.0133357	2.19092	0.36
2	Sexuals	Quadratic	2.96145	12.8396	0.186
2	Sexuals	Linear	0.539431	0.820285	0.25
2	Workers	Quadratic	0.47579	15.9291	0.38
2	Workers	Linear	0.0965281	0.609267	0.384
3	Workers	Linear	0.276336	0.12034	0.066
3	Workers	Quadratic	0.128286	0.20672	0.206
3	Sexuals	Quadratic	0.00285927	2.4123	0.224
3	Sexuals	Linear	0.0535593	0.324428	0.99
4	Sexuals	Quadratic	0.00719938	2.4495	0.084
4	Workers	Linear	-0.144708	0.0924982	0.138
4	Workers	Quadratic	0.0209338	0.240494	0.532
4	Sexuals	Linear	-0.0845178	0.266338	0.566
5	Sexuals	Linear	0.321497	0.307504	0.106
5	Sexuals	Quadratic	0.0177736	3.62158	0.292
5	Workers	Linear	0.0479503	0.0867103	0.334
5	Workers	Quadratic	0.00230116	0.130375	0.384
6	Workers	Linear	0.130775	0.0819671	0.084
6	Workers	Quadratic	-0.11594	0.254638	0.344
6	Sexuals	Linear	0.0842859	0.205528	0.462
6	Sexuals	Quadratic	-0.10172	1.98517	0.832
7	Workers	Linear	0.134243	0.125984	0.256
7	Workers	Quadratic	-0.292098	0.385904	0.382
7	Sexuals	Quadratic	-0.365116	10.837	0.6
7	Sexuals	Linear	0.11006	0.260063	0.64
8	Sexuals	Linear	-0.111416	0.315467	0.304
8	Sexuals	Quadratic	0.439044	5.49197	0.374
8	Workers	Linear	-0.0135848	0.0837322	0.79
8	Workers	Quadratic	-0.0641761	0.255905	0.988
